# Supplementary material for: Rainfall Induced Shallow Landslide Temporal Probability Modelling and Early Warning Research in Mountains Areas: A Case Study of Qin-Ba Mountains, Western China
Source: MDPI journal article supplement (doi:10.3390/rs14235952), 2022-11-24
Supplement: s1 [file s1]

Archive with 1 entries (1 files):
- remotesensing-2012098-Supplementary material-20221202.pdf
